# Supplementary material for: ADAR2 induces reproducible changes in sequence and abundance of mature microRNAs in the mouse brain
Source: PubMed Central journal article supplement (PMC4231736; doi:10.1093/nar/gku844), 2014-09-26
Supplement: supp_gku844_nar-01803-a-2014-File007.pdf [file supp_gku844_nar-01803-a-2014-File007.pdf]

## Supplementary material

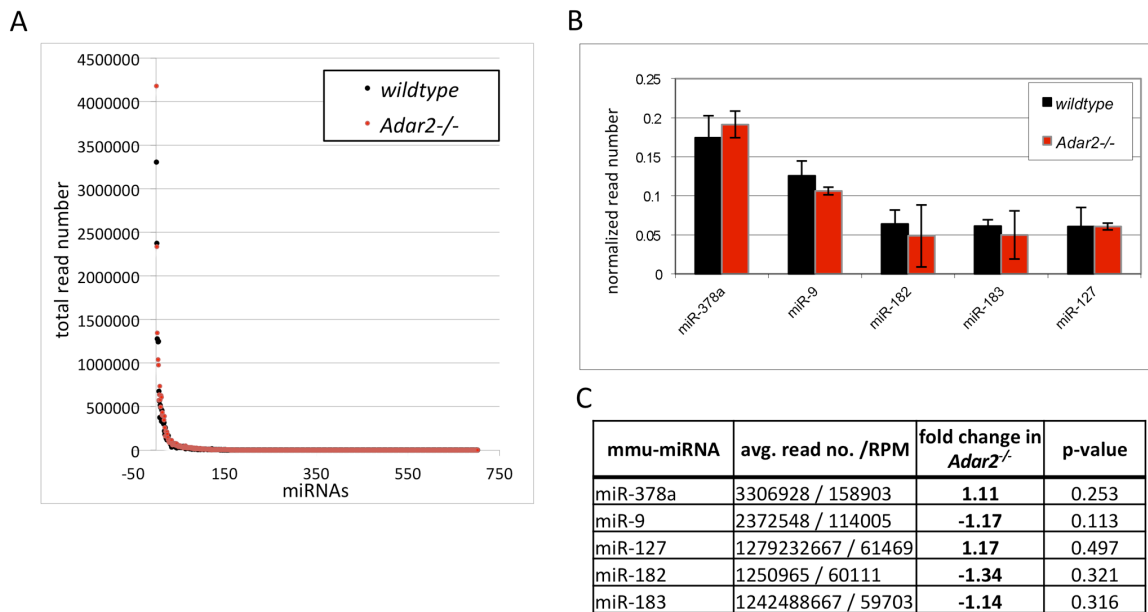

**Supplementary Figure S1: Five miRNAs are highly abundant in mouse brain in all genotypes.** (a) Total read numbers of all detected miRNAs (>10 reads) in wildtype and *Adar2*<sup>-/-</sup> mice are shown (n=3). (b) Normalized read numbers of the 5 most highly expressed miRNAs in wildtype and *Adar2*<sup>-/-</sup> mice are plotted. One of these miRNAs, mmu-miR-378a, was found edited in this and a previous study (1). (c) None of the most highly abundant miRNAs shows a significant change in abundance between wildtype and *Adar2*<sup>-/-</sup> mice.

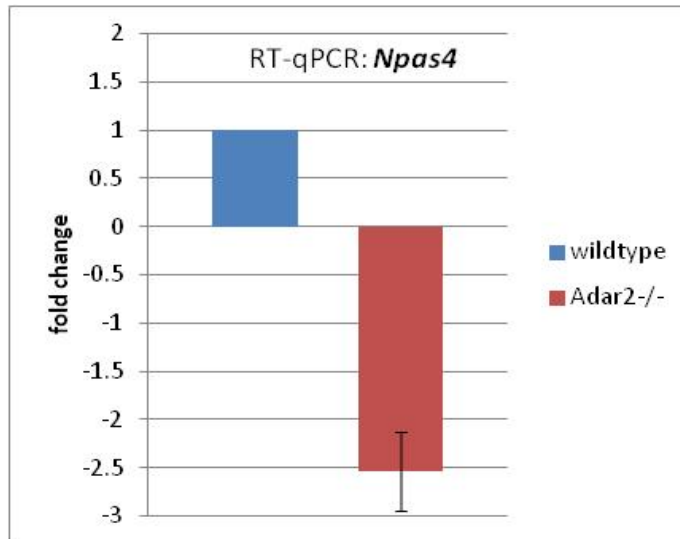

**Supplementary Figure S2:** Quantitative real time PCR verifies downregulation of *Npas4* mRNA in *Adar2*<sup>-/-</sup> brains.

RT-qPCR was performed on 3 biological replicates (n=3) of total brain RNA isolated from wildtype (blue) and *Adar2*<sup>-/-</sup> (red) mice. Primers for  $\beta$ -actin were used as a reference while primers for *Npas4* were used for the experimental RNA. Expression levels were analyzed using the  $\Delta\Delta C_t$  method. Relative (*npas* to *actin*) fold-differences were calculated for wild type and *Adar2*<sup>-/-</sup> mice which shows a clear ~2.5 fold reduction of *Npas4* expression in the absence of ADAR2.

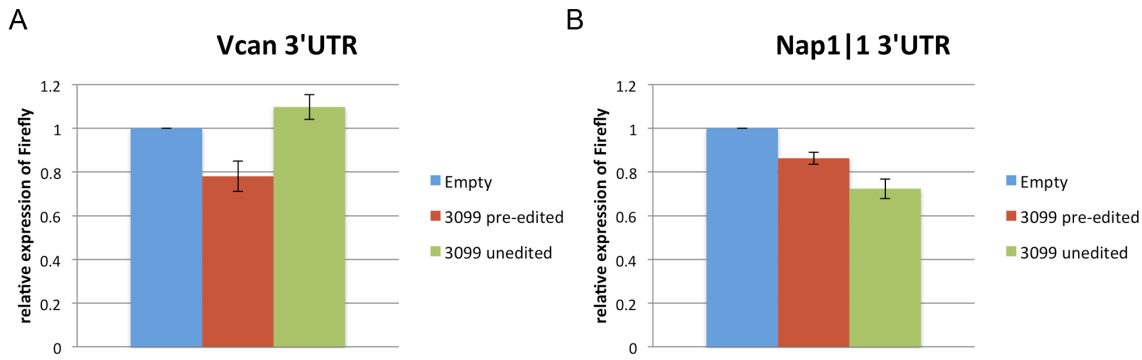

**Supplementary figure S3: Editing of miR-3099 changes its target specificity in ADAR deficient MEFs**

The 3' UTRs of *Nap111* – target of mmu-miR-3099, and *Vcan* – target of edited mmu-miR-3099 were introduced into pMirGlo downstream of the firefly luciferase ORF. The same plasmid also expresses Renilla luciferase as a reference (See main figure 3A for details). A) Relative Luciferase activity for the two reporter constructs was measured for the *Vcan* and B) *Nap111* harboring plasmids 24hrs after cotransfection with control (blue), edited (red), or unedited (green) pri-miR-3099 (n=3). The *Vcan* 3'UTR is clearly repressed by edited miR-3099 while the *Nap111* UTR shows a stronger response to unedited miR-3099.

| KEGG pathways - Targets of unedited miR-3099           |
|--------------------------------------------------------|
| Tight junction                                         |
| Adherens junction                                      |
| Bacterial invasion of epithelial cells                 |
| Arrhythmogenic right ventricular cardiomyopathy (ARVC) |
| Dilated cardiomyopathy                                 |
| KEGG pathways - Targets of edited miR-3099             |
| Glutamatergic synapse                                  |
| Chemokine signaling pathway                            |
| Wnt signaling pathway                                  |
| Basal cell carcinoma                                   |
| Axon guidance                                          |
| Notch signaling pathway                                |
| D-Glutamine and D-glutamate metabolism                 |
| Nitrogen metabolism                                    |
| Proximal tubule bicarbonate reclamation                |

**Supplementary Figure S4:** KEGG pathway analysis of predicted targets of edited and unedited miR-3099. Targets of edited miR-3099 show a clear enrichment for markers expressed during neuronal differentiation (highlighted in red). Enrichment calculation was done using the GeneCodis tool: <http://genecodis.cnb.csic.es/analysis>.

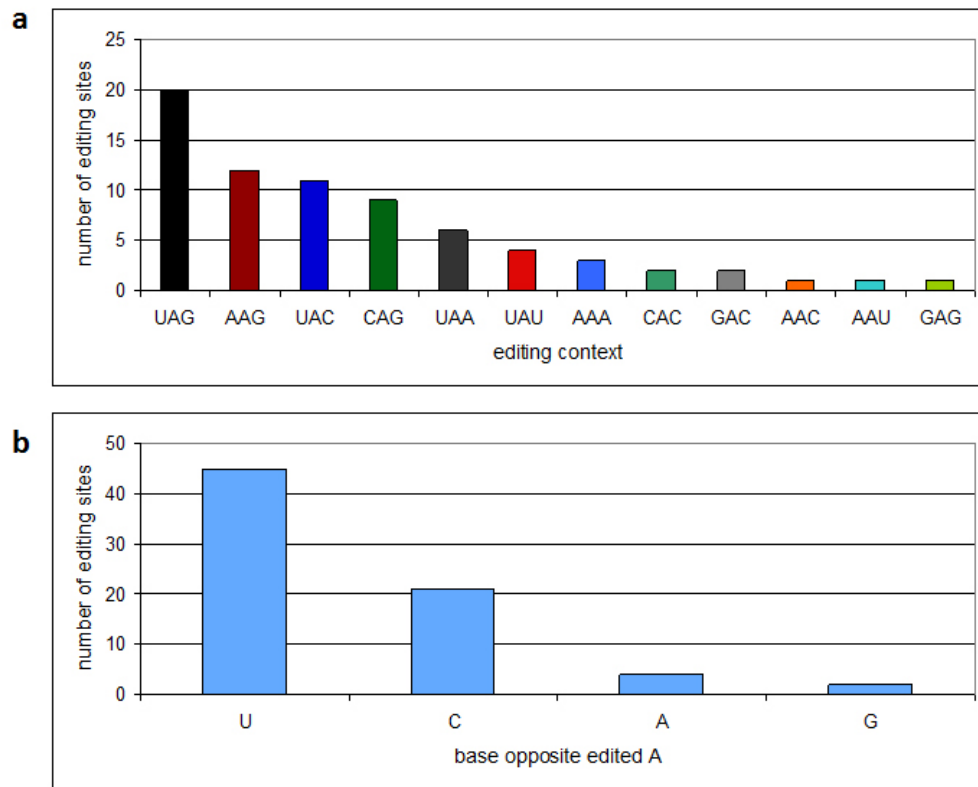

**Supplementary Figure S5: Editing context in mature miRNAs**

Editing site contexts are plotted in absolute numbers sorted by their frequency. (a) Context up- and downstream of the edited A. (b) Base opposite the edited A.

**Supplementary Table S1:** Consistently deregulated miRNAs with their fold changes in ADAR2 knockout brain. Underlined miRNAs were found edited in this study.

| mmu-miRNA   | fold change in ADAR2 | p-value  | avg. read number / RPM |
|-------------|----------------------|----------|------------------------|
| miR-497*    | -2.59                | 3.40E-03 | 2173 / 104             |
| miR-1247*   | -1.59                | 2.70E-03 | 155 / 7                |
| miR-1298*   | -1.55                | 4.92E-02 | 3463 / 166             |
| miR-495*    | -1.54                | 2.86E-02 | 267 / 13               |
| miR-99b     | -1.54                | 3.10E-02 | 167587 / 8053          |
| miR-126-5p  | -1.48                | 6.04E-02 | 85213 / 4095           |
| miR-128-1*  | -1.44                | 2.34E-03 | 1636 / 79              |
| miR-376a*   | -1.44                | 7.07E-02 | 7035 / 338             |
| miR-129-5p  | -1.43                | 8.05E-02 | 25055 / 1204           |
| miR-1937a   | -1.42                | 2.57E-02 | 223 / 11               |
| miR-1981*   | -1.41                | 3.94E-02 | 261 / 13               |
| miR-296-3p  | -1.41                | 2.33E-02 | 171 / 8                |
| miR-30b*    | -1.39                | 8.09E-02 | 766 / 37               |
| miR-99b*    | -1.39                | 2.01E-02 | 4294 / 206             |
| miR-466i-5p | -1.37                | 9.54E-02 | 182 / 9                |
| miR-448-3p  | -1.33                | 7.79E-02 | 2344 / 113             |
| miR-151-3p  | -1.31                | 5.48E-02 | 189662 / 9113          |
| miR-874*    | -1.31                | 3.41E-02 | 956 / 46               |
| miR-335-5p  | 2.76                 | 8.41E-02 | 16070 / 772            |
| miR-15b     | 2.46                 | 9.41E-02 | 124 / 6                |
| miR-98      | 2.27                 | 9.86E-02 | 1911 / 92              |
| miR-467a*   | 2.07                 | 3.11E-02 | 266 / 13               |
| miR-872*    | 2.01                 | 8.31E-02 | 160 / 8                |
| miR-467d*   | 1.92                 | 3.64E-02 | 1033 / 50              |
| miR-540-5p  | 1.90                 | 4.75E-02 | 887 / 43               |
| miR-337-3p  | 1.89                 | 1.78E-02 | 139 / 7                |
| miR-3107    | 1.88                 | 1.78E-02 | 1657 / 80              |
| miR-486     | 1.88                 | 1.78E-02 | 1657 / 80              |
| miR-486*    | 1.87                 | 8.98E-02 | 431 / 21               |
| miR-362-5p  | 1.86                 | 8.54E-02 | 2137 / 103             |
| miR-467e    | 1.83                 | 4.35E-02 | 256 / 12               |
| miR-467d    | 1.83                 | 5.46E-02 | 3711 / 178             |
| miR-411*    | 1.80                 | 8.34E-02 | 944 / 45               |
| miR-676*    | 1.76                 | 3.85E-02 | 481 / 23               |
| miR-376b    | 1.72                 | 8.06E-02 | 735 / 35               |
| let-7b      | 1.61                 | 5.89E-02 | 116880 / 5616          |
| miR-106b    | 1.60                 | 8.27E-02 | 3273 / 157             |
| miR-467a    | 1.56                 | 7.96E-02 | 874 / 42               |
| miR-494     | 1.55                 | 9.50E-03 | 120 / 6                |
| miR-155     | 1.55                 | 1.07E-02 | 132 / 6                |
| miR-466b-3p | 1.52                 | 9.41E-02 | 175 / 8                |
| miR-466c-3p | 1.52                 | 9.41E-02 | 175 / 8                |
| miR-466p-3p | 1.52                 | 9.41E-02 | 175 / 8                |
| miR-489     | 1.51                 | 6.45E-02 | 119 / 6                |
| miR-346     | 1.48                 | 8.97E-02 | 182 / 9                |
| miR-672*    | 1.47                 | 9.49E-02 | 3141 / 151             |

| <b>mmu-miRNA</b> | <b>fold<br/>change in<br/>ADAR2</b> | <b>p-value</b> | <b>avg. read<br/>number / RPM</b> |
|------------------|-------------------------------------|----------------|-----------------------------------|
| miR-146a         | 1.46                                | 9.24E-02       | 5902 / 284                        |
| miR-669c         | 1.45                                | 9.45E-03       | 248 / 12                          |
| miR-129-2-3p     | 1.41                                | 6.54E-02       | 16352 / 786                       |
| miR-592          | 1.40                                | 9.54E-02       | 340 / 16                          |
| miR-22           | 1.32                                | 8.24E-02       | 32003 / 1538                      |
| miR-467c         | 1.32                                | 9.89E-02       | 209 / 10                          |
| miR-879          | 1.32                                | 7.68E-02       | 2295 / 110                        |
| miR-679-5p       | 1.31                                | 1.53E-02       | 595 / 29                          |
| miR-873          | 1.30                                | 8.76E-02       | 1155 / 55                         |

**Supplementary Table S2: Significant T to C transition events in mature miRNAs.**

Test for significance in *Adar2*<sup>-/-</sup> but not in wildtype. The column „frequency (%)“ shows the frequency of a C instead of a T at the respective position. The position in the mentioned miRNA, the number of total reads for this miRNA, the standard deviation (SD) for three replicates, and the sequence specific context before and after the altered U and the position opposite the altered U are given in “context”.

| mmu-miRNA   | position | read number | frequency (%) | SD    | context |
|-------------|----------|-------------|---------------|-------|---------|
| miR-126-5p  | 16       | 72386       | <b>0.18</b>   | 0.044 | GUA/A   |
| miR-429     | 14       | 37253       | <b>0.22</b>   | 0.038 | GUA/A   |
| miR-1       | 8        | 30148       | <b>0.20</b>   | 0.031 | GUA/A   |
| let-7f      | 6        | 18521       | <b>0.35</b>   | 0.103 | GUA/A   |
| miR-194     | 19       | 15315       | <b>0.25</b>   | 0.043 | GUG/A   |
| miR-341     | 17       | 11517       | <b>0.21</b>   | 0.032 | GUC/G   |
| miR-181c*   | 17       | 7428        | <b>0.30</b>   | 0.004 | GUG/A   |
| miR-1839-5p | 18       | 4601        | <b>0.32</b>   | 0.074 | GUC/A   |
| miR-139-5p  | 8        | 2584        | <b>0.43</b>   | 0.051 | GUG/C   |
| miR-374     | 21       | 1860        | <b>0.54</b>   | 0.050 | GUG/A   |
| miR-20a     | 21       | 1840        | <b>0.66</b>   | 0.130 | GUA/A   |
| miR-300*    | 18       | 1762        | <b>0.29</b>   | 0.069 | CUU/G   |
| miR-3057-5p | 15       | 1175        | <b>0.69</b>   | 0.191 | UUC/G   |
| miR-212-3p  | 14       | 1117        | <b>0.61</b>   | 0.111 | GUC/G   |
| miR-3470b   | 19       | 376         | <b>1.87</b>   | 0.509 | CUG/U   |



**Supplementary Table S3:** All detected editing events in mature mouse brain miRNAs sorted by % editing in wildtype. Preferential editing by either ADAR2 or ADAR1 are rated by number of „x“ in the respective columns; with „x“ meaning: preferential editing by the enzyme, and „xxx“ meaning: exclusively edited by the enzyme.

| mmu-miRNA  | position | context | Wt % edit   | SD    | Adarb1 <sup>-/-</sup><br>edit | SD    | Fold<br>change<br>editing | preftl.<br>editing by<br>Adarb1 | preftl.<br>editing by<br>ADAR1 | avg. read number /<br>RPM | Reference  |
|------------|----------|---------|-------------|-------|-------------------------------|-------|---------------------------|---------------------------------|--------------------------------|---------------------------|------------|
| miR-3099   | 7        | UAG/C   | <b>79.8</b> | 6.31  | <b>66</b>                     | 5.03  | -1.2                      |                                 |                                | 2359 / 113                | [1-3]      |
| miR-497*   | 20       | UAC/C   | <b>73.2</b> | 2.49  | <b>3</b>                      | 0.88  | -24.1                     | xxx                             |                                | 1560 / 75                 | [3]        |
| miR-411    | 5        | UAG/C   | <b>68.4</b> | 5.61  | <b>42.2</b>                   | 4.11  | -1.6                      | x                               |                                | 1451 / 70                 | [2-4]      |
| miR-376a*  | 4        | UAG/C   | <b>58.5</b> | 4.75  | <b>6.7</b>                    | 0.9   | -8.7                      | xx                              |                                | 6104 / 293                | [2-4]      |
| miR-497    | 2        | CAG/U   | <b>52.3</b> | 2.05  | <b>1</b>                      | 0.32  | -54.1                     | xxx                             |                                | 1266 / 61                 | [3]        |
| miR-467c   | 3        | AAG/A   | <b>48.2</b> | 3.36  | <b>15</b>                     | 2.71  | -3.2                      | x                               |                                | 259 / 12                  | this study |
| miR-542-3p | 16       | AAC/G   | <b>47.7</b> | 4.98  | <b>63.1</b>                   | 2.94  | 1.3                       |                                 | x                              | 464 / 22                  | this study |
| miR-379    | 5        | UAG/C   | <b>46.4</b> | 4.55  | <b>11.7</b>                   | 0.44  | -4                        | x                               |                                | 103648 / 4980             | [2-4]      |
| miR-376b   | 6        | UAG/U   | <b>45.4</b> | 2.86  | <b>66.1</b>                   | 4.42  | 1.5                       |                                 | xx                             | 1089 / 52                 | [1, 3, 4]  |
| miR-376c   | 6        | UAG/U   | <b>40.3</b> | 5.67  | <b>42.1</b>                   | 1.22  | 1                         |                                 |                                | 1092 / 52                 | [2-4]      |
| let-7e     | 19       | UAG/U   | <b>29.1</b> | 11.93 | <b>42.7</b>                   | 10.46 | 1.5                       |                                 | xx                             | 5152 / 248                | this study |
| miR-467e   | 4        | AAG/C   | <b>26.3</b> | 3.12  | <b>10.6</b>                   | 0.5   | -2.5                      | x                               |                                | 393 / 19                  | this study |
| miR-99b*   | 3        | AAG/U   | <b>15.4</b> | 1.56  | <b>10.8</b>                   | 1.3   | -1.4                      |                                 |                                | 3891 / 187                | [4]        |
| miR-467d   | 3        | AAG/C   | <b>15.2</b> | 1.11  | <b>10.5</b>                   | 0.84  | -1.4                      |                                 |                                | 5331 / 256                | [3]        |
| miR-381    | 4        | UAC/U   | <b>13.7</b> | 2.61  | <b>23</b>                     | 2.53  | 1.7                       |                                 | xx                             | 64443 / 3097              | [1-3]      |
| miR-574-5p | 17       | GAG/U   | <b>13.2</b> | 3.89  | <b>15.3</b>                   | 6.84  | 1.2                       |                                 |                                | 122 / 6                   | this study |
| miR-540-5p | 3        | AAG/U   | <b>12.1</b> | 1.19  | <b>0.2</b>                    | 0.15  | -52.1                     | xxx                             |                                | 1405 / 68                 | [3]        |
| miR-421    | 14       | UAA/A   | <b>10.9</b> | 1.96  | <b>3.3</b>                    | 0.33  | -3.3                      | x                               |                                | 1384 / 67                 | [3]        |
| miR-3099   | 2        | UAG/C   | <b>9.6</b>  | 1.21  | <b>8.2</b>                    | 1.16  | -1.2                      |                                 |                                | 2359 / 113                | this study |
| miR-467a   | 3        | UAA/U   | <b>9.2</b>  | 1.45  | <b>4.8</b>                    | 0.14  | -1.9                      | x                               |                                | 1157 / 56                 | [2]        |
| miR-378a   | 16       | CAG/U   | <b>6.3</b>  | 0.68  | <b>0.2</b>                    | 0.01  | -34.4                     | xxx                             |                                | 3743784 / 179893          | [1, 2]     |
| miR-708*   | 21       | UAG/A   | <b>5.6</b>  | 1.3   | <b>0.4</b>                    | 0.04  | -12.9                     | xx                              |                                | 14031 / 674               | this study |

| mmu-miRNA   | position | context | Wt % edit | SD   | Adarb1 <sup>-/-</sup><br>edit | SD   | Fold<br>change<br>editing | preftl.<br>editing by<br>Adarb1 | preftl.<br>editing by<br>ADAR1 | avg. read number /<br>RPM | Reference  |
|-------------|----------|---------|-----------|------|-------------------------------|------|---------------------------|---------------------------------|--------------------------------|---------------------------|------------|
| miR-411     | 2        | UAG/U   | 5         | 1.26 | 1.1                           | 0.15 | -4.7                      | xx                              |                                | 1451 / 70                 | this study |
| let-7e      | 17       | UAU/U   | 4.9       | 2.42 | 7.1                           | 1.34 | 1.5                       |                                 | xx                             | 5152 / 248                | [2]        |
| miR-467d*   | 9        | UAC/C   | 4.8       | 0.44 | 10.1                          | 2.91 | 2.1                       |                                 | xx                             | 1598 / 77                 | [1, 2]     |
| miR-301b    | 20       | AAA/C   | 4.8       | 1.28 | 1.6                           | 1.33 | -3                        | x                               |                                | 201 / 10                  | this study |
| miR-3061-3p | 3        | UAC/U   | 4.2       | 1.29 | 7.5                           | 0.98 | 1.8                       |                                 | xx                             | 165 / 8                   | this study |
| miR-669c    | 3        | UAG/U   | 3.9       | 1.15 | 0.9                           | 0.16 | -4.5                      | xx                              |                                | 323 / 16                  | this study |
| miR-488     | 5        | AAA/C   | 3.1       | 0.13 | 2.9                           | 0.44 | -1.1                      |                                 |                                | 5993 / 288                | this study |
| miR-151-3p  | 3        | UAG/U   | 2.8       | 1.62 | 4.4                           | 0.71 | 1.6                       |                                 | x                              | 172895 / 8308             | [4]        |
| miR-3086-5p | 2        | UAG/U   | 2.7       | 0.3  | 0.2                           | 0.02 | -17.6                     | xx                              |                                | 4736 / 228                | this study |
| miR-376b*   | 7        | UAU/C   | 2.7       | 0.05 | 0.4                           | 0.23 | -6.4                      | xx                              |                                | 34919 / 1678              | this study |
| miR-154     | 2        | UAG/U   | 2.5       | 0.64 | 0.1                           | 0.02 | -25.8                     | xxx                             |                                | 7473 / 359                | this study |
| miR-384-5p  | 4        | UAA/C   | 2.4       | 0.15 | 1                             | 0.06 | -2.5                      | x                               |                                | 2167 / 104                | this study |
| miR-24      | 21       | CAG/G   | 2.4       | 0.49 | 0.1                           | 0    | -38.8                     | xxx                             |                                | 177863 / 8546             | this study |
| miR-540-5p  | 9        | CAC/C   | 2.4       | 1.25 | 0.2                           | 0.09 | -11.5                     | xx                              |                                | 1405 / 68                 | this study |
| miR-301a    | 20       | AAA/C   | 2.4       | 0.48 | 0.1                           | 0.07 | -19.6                     | xx                              |                                | 5391 / 259                | [2]        |
| miR-770-5p  | 4        | CAC/A   | 2.4       | 0.88 | 0.8                           | 0.21 | -2.9                      |                                 |                                | 2081 / 100                | this study |
| miR-466a-3p | 4        | UAC/U   | 2.3       | 0.55 | 2.3                           | 0.42 | 1                         |                                 |                                | 438 / 21                  | this study |
| miR-466e-3p | 4        | UAC/U   | 2.3       | 0.55 | 2.3                           | 0.42 | 1                         |                                 |                                | 438 / 21                  | this study |
| miR-467e    | 3        | UAA/U   | 2.1       | 0.65 | 2.1                           | 0.44 | 1                         |                                 |                                | 393 / 19                  | this study |
| let-7d*     | 5        | UAC/C   | 1.9       | 1.07 | 0                             | 0    | 0                         |                                 |                                | 218 / 10                  | this study |
| miR-421     | 7        | CAG/U   | 1.9       | 0.13 | 1.5                           | 0.27 | -1.3                      |                                 |                                | 1384 / 67                 | this study |
| miR-381     | 7        | AAG/U   | 1.9       | 0.12 | 2.3                           | 0.06 | 1.2                       |                                 | x                              | 64443 / 3097              | this study |
| miR-708*    | 6        | UAG/U   | 1.8       | 0.24 | 1.7                           | 0.25 | -1.1                      |                                 |                                | 14031 / 674               | this study |
| miR-195     | 5        | CAG/U   | 1.7       | 0.3  | 0                             | 0.02 | -42.9                     | xxx                             |                                | 21647 / 1040              | this study |
| miR-219-3p  | 15       | GAC/U   | 1.7       | 1.56 | 2.5                           | 1.71 | 1.5                       |                                 | xx                             | 17700 / 851               | [3]        |
| miR-24-2*   | 7        | UAC/C   | 1.6       | 0.56 | 0                             | 0.03 | -41.2                     | xxx                             |                                | 1262 / 61                 | [2]        |
| miR-335-5p  | 4        | AAG/C   | 1.5       | 0.34 | 0.8                           | 0.08 | -1.7                      | x                               |                                | 32768 / 1575              | this study |

| mmu-miRNA  | position | context | Wt % edit  | SD   | Adarb1 <sup>-/-</sup> edit | SD   | Fold change editing | preftl. editing by Adarb1 | preftl. editing by ADAR1 | avg. read number / RPM | Reference  |
|------------|----------|---------|------------|------|----------------------------|------|---------------------|---------------------------|--------------------------|------------------------|------------|
| miR-137    | 16       | UAC/U   | <b>1.4</b> | 0.38 | <b>0.1</b>                 | 0.02 | -11.5               | xx                        |                          | 15990 / 768            | this study |
| miR-222    | 15       | UAC/U   | <b>1.3</b> | 0.23 | <b>0.4</b>                 | 0.12 | -3.2                | x                         |                          | 3976 / 191             | this study |
| miR-184    | 17       | UAA/U   | <b>1.3</b> | 0.57 | <b>1.4</b>                 | 0.43 | 1.1                 |                           |                          | 1112 / 53              | this study |
| miR-873    | 3        | CAG/C   | <b>1.3</b> | 0.69 | <b>0.2</b>                 | 0.06 | -7.4                | xx                        |                          | 1417 / 68              | this study |
| miR-98     | 11       | AAG/U   | <b>1.2</b> | 0.89 | <b>1.2</b>                 | 0.29 | 1                   |                           |                          | 3236 / 155             | [2]        |
| let-7d     | 19       | UAG/U   | <b>1.1</b> | 0.43 | <b>0.8</b>                 | 0.27 | -1.4                |                           |                          | 2969 / 143             | this study |
| miR-467d   | 2        | UAA/U   | <b>1.1</b> | 0.15 | <b>0.7</b>                 | 0.08 | -1.5                | x                         |                          | 5331 / 256             | this study |
| miR-300    | 7        | AAG/U   | <b>1</b>   | 0.08 | <b>0.3</b>                 | 0.02 | -3.4                | x                         |                          | 11284 / 542            | this study |
| miR-488    | 6        | AAG/U   | <b>0.9</b> | 0.18 | <b>0.9</b>                 | 0.18 | 1                   |                           |                          | 5993 / 288             | this study |
| miR-338-3p | 4        | CAG/U   | <b>0.9</b> | 0.15 | <b>0.1</b>                 | 0.01 | -13.6               | xx                        |                          | 7953 / 382             | this study |
| miR-467d*  | 5        | UAC/U   | <b>0.8</b> | 0.21 | <b>0.8</b>                 | 0.23 | 1                   |                           |                          | 1598 / 77              | this study |
| miR-203    | 21       | UAG/C   | <b>0.7</b> | 0.13 | <b>0</b>                   | 0.02 | -23                 | xx                        |                          | 1941 / 93              | [4]        |
| miR-101b   | 4        | CAG/U   | <b>0.7</b> | 0.32 | <b>0.2</b>                 | 0.04 | -3.9                | x                         |                          | 222048 / 10670         | this study |
| miR-708    | 2        | AAG/U   | <b>0.7</b> | 0.08 | <b>0.6</b>                 | 0.05 | -1.1                |                           |                          | 33924 / 1630           | this study |
| miR-98     | 17       | UAU/U   | <b>0.6</b> | 0.07 | <b>0.8</b>                 | 0.38 | 1.3                 |                           | x                        | 3236 / 155             | this study |
| miR-130a   | 8        | AAU/U   | <b>0.6</b> | 0.09 | <b>0.9</b>                 | 0.36 | 1.6                 |                           | xx                       | 8972 / 431             | [2]        |
| miR-378a   | 6        | GAC/U   | <b>0.5</b> | 0.25 | <b>0.4</b>                 | 0.12 | -1.4                |                           |                          | 3743784 / 179893       | this study |
| miR-130a   | 16       | AAG/U   | <b>0.5</b> | 0.1  | <b>0.1</b>                 | 0.02 | -5.6                | xx                        |                          | 8972 / 431             | this study |
| miR-140    | 16       | UAU/C   | <b>0.5</b> | 0.08 | <b>0.1</b>                 | 0.02 | -7.6                | xx                        |                          | 17240 / 828            | this study |
| let-7f     | 19       | UAG/U   | <b>0.4</b> | 0.14 | <b>0.3</b>                 | 0.05 | -1.5                | x                         |                          | 18520 / 890            | this study |
| miR-29b    | 2        | UAG/U   | <b>0.4</b> | 0.07 | <b>0.2</b>                 | 0.03 | -1.6                | x                         |                          | 42057 / 2021           | this study |
| miR-29c    | 2        | UAG/U   | <b>0.3</b> | 0.02 | <b>0.1</b>                 | 0.01 | -4                  | x                         |                          | 51535 / 2476           | this study |
| let-7g     | 19       | CAG/U   | <b>0.3</b> | 0.05 | <b>0.4</b>                 | 0.09 | 1.2                 |                           |                          | 88633 / 4259           | this study |

## References for Supplementary material

1. Vesely, C., Tauber, S., Sedlazeck, F.J., von Haeseler, A. and Jantsch, M.F. (2012) Adenosine deaminases that act on RNA induce reproducible changes in abundance and sequence of embryonic miRNAs. *Genome Research*, 22, 1468-1476.
2. Ekdahl, Y., Farahani, H.S., Behm, M., Lagergren, J. and Öhman, M. (2012) A-to-I editing of microRNAs in the mammalian brain increases during development. *Genome Research*, 22, 1477-1487.
3. Chiang, H.R., Schoenfeld, L.W., Ruby, J.G., Auyeung, V.C., Spies, N., Baek, D., Johnston, W.K., Russ, C., Luo, S., Babiarz, J.E. et al. (2010) Mammalian microRNAs: experimental evaluation of novel and previously annotated genes. *Genes & Development*, 24, 992-1009.
4. Kawahara, Y., Megraw, M., Kreider, E., Iizasa, H., Valente, L., Hatzigeorgiou, A.G. and Nishikura, K. (2008) Frequency and fate of microRNA editing in human brain. *Nucleic Acids Research*, 36, 5270-5280.
